# Supplementary material
Source: MDPI journal article supplement (https://www.mdpi.com/2073-4360/7/11/1512)

## Supplementary Materials

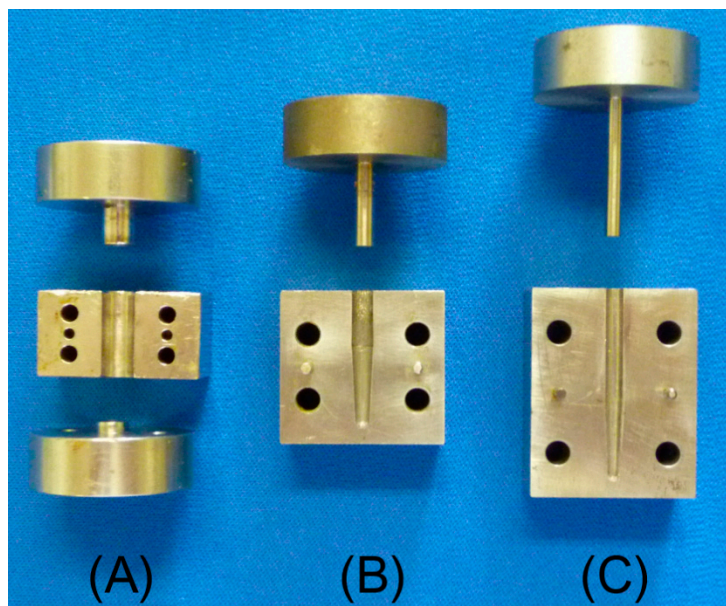

**Figure S1.** Photograph of the split-type metal mold (A) for preparing the cylindrical test specimen; (B) for preparing the trial point; (C) for deformation of the trial point.

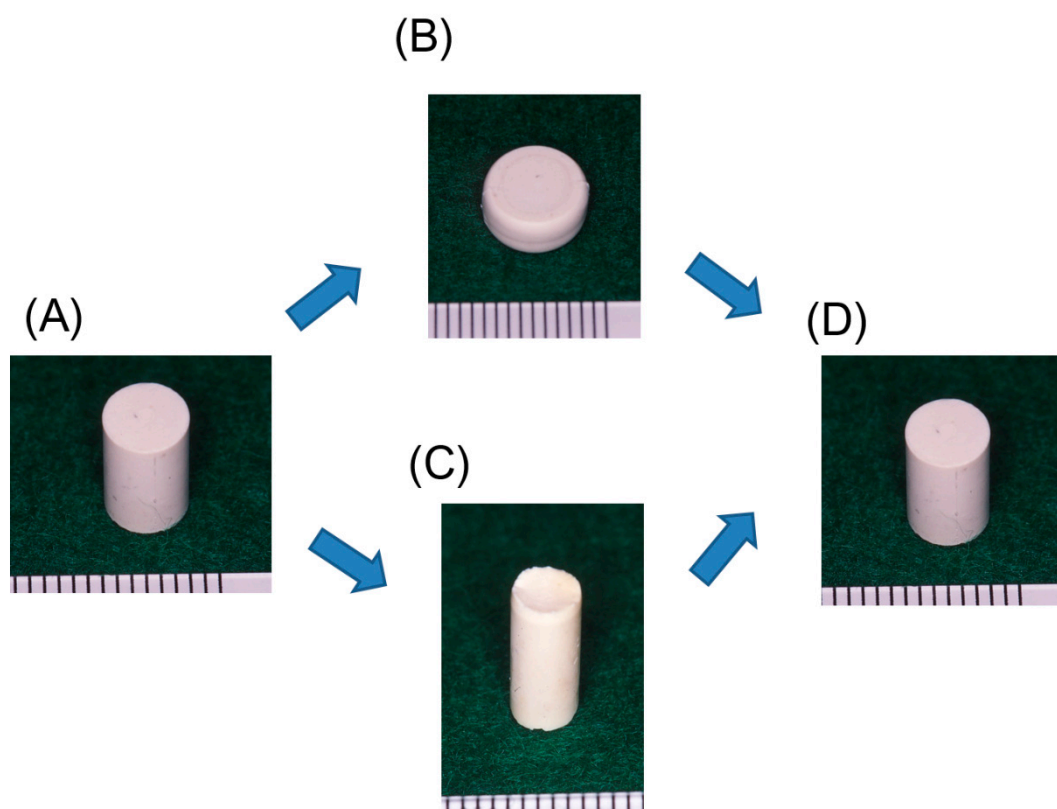

**Figure S2.** Photograph of the cylindrical test specimen: (A) original shape (diameter-6.0 mm); (B) deformed shape (30% compressed); (C) deformed shape (diameter-4.6 mm); (D) recovery shape.

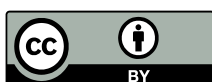

Supplement: s1 [file s1]
